# Supplementary material for: Evaluating Clinical Outcomes for Determining the Optimal Delay to Skin Incision under WALANT: A Prospective Series of 34 Patients from a Low-Resource Tertiary Setting
Source: Adv Orthop. 2020 Aug 15;2020:9351354. doi: 10.1155/2020/9351354 (PMC7481922; doi:10.1155/2020/9351354)
Supplement: Supplementary Materials — List of Minor Hand Surgeries done at our institution from January–December 2019. Surgeries performed were labeled as either WALANT or non-WALANT cases. [file 9351354.f1.xls]

## Sheet: WALANT
Case	Age	Sex	Diagnosis	Technique	Timing (mins)	Blood Loss (cc)	Incision (cm)	OR Time (mins)	VRS: Preop	VRS: 1 hour PostOp	Complication		Management	Outcome
1	47	Female	Trigger Finger	WALANT	7	6	1.5	6	0	1	None
2	49	Female	Trigger Finger	WALANT	30	3	1.5	7	2	1	None
3	49	Female	Trigger Finger	WALANT	30	3	1.5	7	1	1	None
4	37	Male	Trigger Finger	WALANT	7	6	1.5	6	1	0	None
5	75	Male	Trigger Finger	WALANT	7	3	1.5	6	2	1	None
6	56	Male	Trigger Finger	WALANT	30	6	1.5	5	1	0	None
7	56	Male	Trigger Finger	WALANT	30	3	1.5	6	2	0	None
8	39	Male	Trigger Finger	WALANT	7	6	1.5	8	1	0	None
9	38	Female	Trigger Finger	WALANT	7	3	1.5	8	0	1	None
10	31	Male	Trigger Finger	WALANT	7	12	1.5	6	0	1	None
11	42	Male	Trigger Finger	WALANT	30	6	1.5	5	1	1	None
12	52	Female	Trigger Finger	WALANT	30	3	1.5	7	0	0	None
13	53	Female	Trigger Finger	WALANT	7	6	1.5	6	1	1	Yes	Dehiscence	Debridment, Primary Closure	Improved
14	55	Male	Trigger Finger	WALANT	30	6	1.5	7	2	0	None
15	42	Male	Trigger Finger	WALANT	30	6	1.5	7	2	0	None
16	52	Female	Trigger Finger	WALANT	30	12	1.5	6	2	1	None
17	51	Male	Trigger Finger	WALANT	7	27	1.5	12	2	1	Yes	Digital Vessel Injury	Digital Pressure	Improved
18	41	Female	Trigger Finger	WALANT	7	6	1.5	7	2	0	None
19	59	Male	Trigger Finger	WALANT	30	3	1.5	7	1	1	None
20	54	Female	Trigger Finger	WALANT	7	12	1.5	10	1	0	Yes	Painful Neuroma	Oral Pregabalin	Improved
21	54	Female	Trigger Finger	WALANT	30	6	1.5	7	1	0	None
22	48	Male	Trigger Finger	WALANT	7	6	1.5	8	1	0	None
23	41	Female	Trigger Finger	WALANT	7	6	1.5	7	1	1	None
24	41	Female	Trigger Finger	WALANT	7	3	1.5	7	1	1	None
25	75	Male	Trigger Finger	WALANT	30	3	1.5	6	2	1	None
26	51	Female	Carpal Tunnel Syndrome	WALANT	7	6	2	6	2	1	None
27	52	Female	Carpal Tunnel Syndrome	WALANT	30	6	2	7	2	0	None
28	43	Female	Carpal Tunnel Syndrome	WALANT	30	6	2	7	2	1	None
29	45	Male	Carpal Tunnel Syndrome	WALANT	7	12	3	8	2	1	None
30	68	Female	Carpal Tunnel Syndrome	WALANT	7	6	2	7	2	1	None
31	68	Female	Carpal Tunnel Syndrome	WALANT	30	6	2	6	2	1	None
32	58	Male	Mass Excision	WALANT	7	12	3	9	1	0	None
33	39	Male	Mass Excision	WALANT	30	6	2.5	8	0	0	None
34	64	Female	Mass Excision	WALANT	30	6	2.5	11	1	0	None
1	47	F	Carpal Tunnel Syndrome	Non-WALANT	N/A	N/A	N/A	N/A	N/A	N/A	None
2	55	M	Trigger Finger	Non-WALANT	N/A	N/A	N/A	N/A	N/A	N/A	None
3	68	F	Trigger Finger	Non-WALANT	N/A	N/A	N/A	N/A	N/A	N/A	None
4	45	M	Trigger Finger	Non-WALANT	N/A	N/A	N/A	N/A	N/A	N/A	None
5	32	F	Trigger Finger	Non-WALANT	N/A	N/A	N/A	N/A	N/A	N/A	None
6	27	M	Ganglion Cyst	Non-WALANT	N/A	N/A	N/A	N/A	N/A	N/A	None
7	42	F	Trigger Finger	Non-WALANT	N/A	N/A	N/A	N/A	N/A	N/A	Yes	SSI	Oral Antibiotics	Improved
8	35	M	Carpal Tunnel Syndrome	Non-WALANT	N/A	N/A	N/A	N/A	N/A	N/A	None
9	23	F	Mass	Non-WALANT	N/A	N/A	N/A	N/A	N/A	N/A	None
10	55	F	Trigger Finger	Non-WALANT	N/A	N/A	N/A	N/A	N/A	N/A	None
11	50	M	Trigger Finger	Non-WALANT	N/A	N/A	N/A	N/A	N/A	N/A	None
12	67	F	Trigger Finger	Non-WALANT	N/A	N/A	N/A	N/A	N/A	N/A	None
13	65	F	Trigger Finger	Non-WALANT	N/A	N/A	N/A	N/A	N/A	N/A	None
14	58	M	Trigger Finger	Non-WALANT	N/A	N/A	N/A	N/A	N/A	N/A	None
15	56	M	Carpal Tunnel Syndrome	Non-WALANT	N/A	N/A	N/A	N/A	N/A	N/A	None
16	48	F	Trigger Finger	Non-WALANT	N/A	N/A	N/A	N/A	N/A	N/A	None
17	40	F	Trigger Finger	Non-WALANT	N/A	N/A	N/A	N/A	N/A	N/A	None
18	57	M	Trigger Finger	Non-WALANT	N/A	N/A	N/A	N/A	N/A	N/A	None
19	35	F	Trigger Finger	Non-WALANT	N/A	N/A	N/A	N/A	N/A	N/A	Yes	Stiffness	Physical Therapy	Improved
